1 Title:

2

3 **Genes responsible for avoiding attack of a beetle, relating to the**  
4 **duration of death feigning**

5

6 **ABSTRACT**

7 Predator avoidance is an important behavior that affects the degree of  
8 adaptation of organisms. We compared the DNA variation of one of the  
9 predator-avoidance behaviors, the recently extensively studied "death-feigning  
10 behavior," between the long strain bred for feigning death for a long time and  
11 the short strain bred for feigning death for a short time. To clarify how the  
12 difference in DNA sequences between the long and short strains corresponds to  
13 the physiological characteristics of the death-feigning duration at the  
14 transcriptome level, we performed comprehensive and comparative analyses of  
15 gene variants in *Tribolium castaneum* strains using DNA-re-sequencing. The  
16 duration of death feigning involves many gene pathways, including caffeine  
17 metabolism, tyrosine metabolism, tryptophan metabolism, metabolism of  
18 xenobiotics by cytochrome P450, longevity regulating pathways, and circadian  
19 rhythm. Artificial selection based on the duration of death feigning results in  
20 the preservation of variants of genes in these pathways in the long strain.  
21 When an animal wakes up from a near-death experience is closely related to its  
22 success in avoiding predation. This study suggests that many metabolic  
23 pathways and related genes may be involved in the decision-making process of  
24 anti-predator animal behavior by forming a network in addition to the tyrosine  
25 metabolic system, including dopamine, revealed in previous studies.

26

27 **Authors and Competing information**

28

29 **Authors**

30 Keisuke Tanaka<sup>1</sup>

31 Ken Sasaki<sup>2</sup>

32 Kentarou Matsumura<sup>3</sup>

33 Shunsuke Yajima<sup>1,4</sup>

34 Takahisa Miyatake<sup>3</sup>

35

36 1. NODAI Genome Research Center, Tokyo University of Agriculture, 1-1-1  
37 Sakuragaoka, Setagaya-ku, Tokyo 156-8502, Japan.

38

39 2. Graduate School of Agriculture, Tamagawa University, Machida, Tokyo  
40 194-8610, Japan.

41

42 3. Graduate School of Environmental and Life Science, Okayama University,  
43 1-1-1 Tsushina-naka, Kita-ku, Okayama 700-8530, Japan.

44

45 4. Department of Bioscience, Tokyo University of Agriculture,  
46 1-1-1, Sakuragaoka, Setagaya-ku, Tokyo 156-8502, Japan.

47

48 \*Corresponding author

49 [miyatake@okayama-u.ac.jp](mailto:miyatake@okayama-u.ac.jp)

50

51

52

53 **Additional information**

54

55 **Author contributions statement**

56 The study was conceived by K.T., K.S., K.M. S.Y., and T.M. The experiments were  
57 designed by K.T., K.S., S.Y., and T.M., and these were performed by K.T., K.S., and  
58 K.M. The data was analyzed by K.T., K.S., and TM. The manuscript was written by  
59 K.T., K.S., and T.M. All authors approved the final version prior to submission.

60

61

62 **Competing interests statement**

63 The all authors declare no competing interests including financial and non-  
64 financial interests, and we confirm that the manuscript matches the competing  
65 interests statement on the journal system.

66

67

68 **Ethical approval and informed consent**

69 N/A because of insects.

70

71

72

73

## 74 **Introduction**

75           Since Edmund<sup>1</sup>, much research has focused on the behaviors adopted by  
76 animals to avoid attack by enemies<sup>2</sup>. Death feigning (or thanatosis, tonic  
77 immobility, playing possum, playing dead, post-contact immobility, and so on)  
78 that have recently received special attention is one way to avoid enemy  
79 attack<sup>3,4,5,6</sup>. It has also been considered an adaptive behavior for females to avoid  
80 male harassment<sup>7,8,9,10,11</sup> and for individuals to avoid worker aggressions in  
81 social insects<sup>12</sup>. Although the adaptive significance of death-feigning behavior  
82 has become widely recognized, very little research has been done on its  
83 molecular mechanisms.

84           Recently, Uchiyama et al.<sup>13</sup> compared transcriptomes of beetle strains  
85 selected for short and long durations of death feigning. In *Tribolium castaneum*,  
86 strains divergently selected for short (S strains) and long (L strains) durations  
87 of death feigning, which is activated by external stimuli, have been established  
88 in the laboratory<sup>3,14,15,16</sup>.

89           A previous study identified 518 differentially expressed genes (DEGs)  
90 between the strains by transcriptome analysis, because RNA sequencing (RNA-  
91 seq), is rapidly gaining momentum in an effort to reveal the molecular  
92 mechanisms underlying physiological mechanisms<sup>13</sup>. The study revealed that  
93 tyrosine metabolic pathways including dopamine synthesis genes, stress-  
94 response genes, and insulin signaling pathways were differentially activated  
95 between individuals of short and long strains<sup>13</sup>. However, we cannot determine  
96 which part of the DNA caused the degree of transcription to change by  
97 transcriptome analysis alone.

98           A reciprocal crossing experiment between short and long strains for

99 duration of death feigning showed that it occurred more frequently and for  
100 shorter periods in the F1 population with dominance in the short direction. From  
101 the F2 population, the death-feigning duration showed continuous segregation,  
102 indicating the duration of death feigning is controlled by polygenes in *T.*  
103 *castaneum*<sup>17</sup>. This result is consistent with the finding of many expressed RNAs  
104 involved by Uchiyama et al.<sup>13</sup>. The duration of death feigning has been found to  
105 be multilaterally expressed with other traits of insects: for example, locomotor  
106 activity in *T. castaneum*<sup>14</sup>, *T. confusum*<sup>18</sup>, and *T. freemani*<sup>19</sup>, flight ability in  
107 *Callosobruchus chinensis*<sup>20</sup>, life history traits in *C. chinensis*<sup>21</sup>, and mating  
108 behavior in *T. castaneum*<sup>22</sup> and *C. chinensis*<sup>23</sup>. Therefore, it is easy to predict that  
109 the duration of a behavioral trait will be genetically affected by many other traits.  
110 Thus, we need to clarify how many genes influence the selection for the duration  
111 of death feigning on a DNA level.

112 To clarify how differences in DNA sequences between the long and short  
113 strains correspond to the physiological characteristics of the death-feigning  
114 duration at the transcriptome level, we performed comprehensive and  
115 comparative analyses of gene variants in *T. castaneum* strains using DNA-  
116 resequencing.

117

## 118 **Results**

119 The results of resequencing analysis showed variations of DNA sequence  
120 from the reference sequence in both long and short strains, and the variations  
121 were detected more frequently in the long strain in a whole genome. The  
122 variations were present in several genes including caffeine metabolism, tyrosine  
123 metabolism, tryptophan metabolism, metabolism of xenobiotics by cytochrome

124 P450, longevity regulating pathway, and circadian rhythm.

125           Small nucleotide variants as SNV and multi-nucleotide variants (MNV) as  
126 deletion, insertion, and replacement were detected in long and short strains. The  
127 numbers of small variants in total were larger in long strains than short strains  
128 (Fig. 1). The most frequent type of small variants was SNV, and the proportions  
129 of SNV were 86.3% (5,813 / 6,734) in long strains and 86.7% (1,279 / 1,476) in  
130 short strains, respectively (Fig. 1A). The SNVs compared with the reference  
131 nucleotide occurred frequently between adenine and guanine or cytosine and  
132 thymine in both long and short strains (Fig. 1B), and the frequencies were up to  
133 three times as large as other base combinations, indicating more frequent  
134 transition and fewer transversion variants. Deletion and insertion ranged from  
135 one to nine bases in both long and short strains, with one and three bases  
136 especially were frequently deleted or inserted (Fig. 1C). Homozygosity  
137 presented more frequently than heterozygosity in all linkage groups, and it was  
138 approximately two-fifteenths times and two-twelfths times as large as  
139 heterozygosity in long and short strains, respectively (Fig. 1D). Homozygosity of  
140 variants was the most frequent in linkage group 7 (LG7) in the long strain and  
141 in linkage groups 2 (LG2) and 8 (LG8) in the short strain, respectively. The ratios  
142 of homozygosity to heterozygosity were the largest in LGX and LG2 in long and  
143 short strains, respectively.

144           Genes with variants were more numerous in the long strain (3,384) than  
145 the short strain (1,075), and 718 genes were overlapped between the strains  
146 (Fig. 2A). Among these genes, the most frequent number of non-synonymous  
147 variants per gene was 1 in both strains, and the frequency gradually decreased  
148 as the number increased (Fig. 2B). The functions of genes with variants were

149 sorted into four categories by enrichment analyses (Fig. 2c). In the biological  
150 process, molecular function, and Kyoto Encyclopedia of Genes and Genomes  
151 (KEGG) pathway, the long strain had a larger fold enrichment and larger  
152 statistical values than the short strain, while the short strain had a larger fold  
153 enrichment and statistical values in the “cellular component” than the long  
154 strain. The Gene Ontology (GO) term of “metabolic process” had the largest  
155 statistical value in the long strain, and KEGG Ontology (KO) terms “ECM-receptor  
156 interaction”, “ABC transporters” and “other glycan degradation” had larger  
157 statistical values in the long strain than the short strain.

158 Structural variations including large-scale InDel, copy number variation  
159 (CNV), and presence/absence variation (PAV) were analyzed in both strains (Fig.  
160 3). Large-scale insertions and deletions were analyzed in 10 to 390 bases, and  
161 15–20 bases of insertion and deletion were the most frequent in both strains  
162 (Fig. 3A). CNV deletions were present more frequently in sizes ranging from 5 to  
163 16 kbases than in other size scales that we examined in both strains, whereas  
164 CNV duplications were constantly less frequent at 0 to 3 cases (Fig. 3B). In a  
165 larger size scale of nucleotides, up to 7000 kbases, the presence of variations  
166 less than 500 kbases of nucleotide sizes was most frequent in the long strain (Fig.  
167 3C). All of these are illustrated on each linkage group in Fig. 4A, indicating large-  
168 scale insertions and deletions constantly appearing in each linkage group (A and  
169 B), less frequent CNV duplications (C), and more frequent CNV deletions (D).  
170 Large CNV deletions were present in LG6 and LG7 in the long strain and in LG2  
171 in the short strain, respectively. These variations were sorted into GO and KO  
172 terms (Fig. 4B). The term of “neuroactive ligand-receptor interaction” had the  
173 largest statistical value in the long strain.

174 A protein–protein interaction (PPI) network including enzymes involved  
175 in dopamine metabolism was constructed (Fig. 5). Tyrosine hydroxylase (*Th*)  
176 was connected with DOPA decarboxylase (*Ddc*) and dopamine *N*-  
177 acetyltransferase (*Dat*), and these enzymes have been reported as differentially  
178 expressed genes in the long strain analyzed by RNA-seq<sup>13</sup>. *Th* also had variations  
179 of DNA sequence in the short strain (Fig. 5). Among the PPI network, proteins  
180 with variants were more frequent in the long strain. Yellow-like protein had  
181 variants in the long strain, and it was indirectly connected with *Ddc* and *Th* and  
182 directly with *Dat*.

183 Pathways containing genes with variants in both long and short strains  
184 were analyzed in “caffeine metabolism (tca00232)” (Fig. 6A), “tyrosine  
185 metabolism (tca00350)” (Fig. 6B), “tryptophan metabolism (tca00380)” (Fig. 6C),  
186 “metabolism of xenobiotics by cytochrome P450 (tca00980)” (Fig. 6D),  
187 “longevity regulating pathway - multiple species (tca04213)” (Fig. 6E), and  
188 “circadian rhythm - fly (tca04711)” (Fig. 6F). Tyrosine metabolism and  
189 longevity-regulating pathways have been listed as pathways containing focal  
190 genes with different expressions between long and short strains as detected by  
191 RNA-seq<sup>13</sup>. Except for circadian rhythm, the numbers of variants of genes in  
192 these pathways were larger in the long strain than the short strain (Fig. 6).

193

## 194 **Discussion**

195 The present study compared DNA sequences in a whole genome between  
196 the long strain and reference individuals or the short strain and reference  
197 individuals in *T. castaneum*. The analyses detected small variants, including SNV,  
198 MNV, deletion, insertion and replacement in particular genes in the particular



199 metabolic and signaling pathways in both long and short strains. Especially, the  
200 long strain had more variants in a particular gene than those in the short strain.  
201 This was the case in the structural variations including large-scale InDel, CNV,  
202 and PAV. These large-scale variations were frequently detected in the long strain.  
203 The frequent variations of DNA sequences in the long strain may cause  
204 production of more diverse gene expressions in the long strain. Artificial  
205 selection based on the duration of death feigning results in the preservation of  
206 variants in genes in these particular metabolic and signaling pathways in the  
207 long strain, whereas the short strain with fewer variants of the DNA sequence  
208 might be selected more strongly than the long strain.

209

#### 210 *Caffeine metabolism*

211 In the KEGG pathway, there were significant inter-strain differences in  
212 CYOIA2, 7-methyluric acids, 3,7-dimethyluric acid, and 1-methyluric acid (Fig.  
213 6A). Oral ingestion and injection of caffeine have been shown to shorten the  
214 death-feigning duration of adults in the long strains of *T. castaneum*<sup>24</sup>. As similar  
215 phenomenon has been found in the related species *T. confusum*, in which strains  
216 selected for longer duration had shorter death-feigning duration when they had  
217 ingested caffeine orally<sup>25</sup>. Nakayama et al.<sup>25</sup> concluded that the dopaminergic  
218 system plays an important part in controlling the genetic correlation between  
219 death feigning and activity levels in these *Tribolium* species. Caffeine is known  
220 as a dopamine activator. Therefore, the present result demonstrates the  
221 relationship between the caffeine-dopamine system and death feigning at the  
222 genome level.

223

224 *Tyrosine metabolism*

225           The results of the transcriptome by the RNA-seq study<sup>13</sup> and the current  
226 DNA analysis are consistent with the tyrosine metabolic system (Fig. 6B).  
227 Variants in DNA sequence were found in four genes in the long strain and one  
228 gene with variants in two sequence locations in the short strain. One of the four  
229 genes in the long strain was “*Ddc*”, which is involved in the direct synthesis of  
230 dopamine, and one of the genes in the short strain was “*Th*”, which is involved  
231 in the synthesis of L-dopa, the precursor of dopamine. In the previous RNA-seq  
232 study<sup>13</sup>, the expression levels of these genes were found to be significantly  
233 higher in the long strain, so they may be affected by the DNA sequences revealed  
234 in the present results. The tyrosine and phenylalanine metabolic systems might  
235 be associated with the tryptophan metabolic system. Genome analysis showed  
236 more variants in genes of the tryptophan metabolic system than in the tyrosine  
237 metabolic system, but the proteins of the tryptophan metabolic system are  
238 related to the tyrosine metabolism. Because many variants seem to occur in the  
239 gene region related to glucose metabolism, the difference in the amount of ATP  
240 produced as a result of glucose metabolism may also affect the effects of caffeine.  
241 Insect hormone biosynthesis may also be related to this pathway. In the KEGG,  
242 there is a significant difference in franesol, juvenile hormone, and CYP307A1/2.  
243 The ecdysteroids may have an effect on tyrosine metabolism and dopamine  
244 synthesis. One of insect hormones is juvenile hormone synthesis, which may also  
245 be related to dopamine synthesis.

246

247 *Tryptophan metabolism*

248           In the KEGG pathway of tryptophan metabolism, 16 genes showed

249 differences between strains (Figure 6C). There are four possible explanations  
250 for how mutations in the tryptophan metabolic system indirectly affect gene  
251 expression. (1) Differences in serotonin levels and serotonin synthase gene  
252 expression may be related to the tryptophan metabolism. (2) The amount of  
253 melatonin, a metabolite of serotonin, and together with serotonin, is related to  
254 variations in circadian rhythms (also see Figure 6F), which will be discussed  
255 later. (3) Metabolism of the ommochrome system (ommochrome is a pigment  
256 substance that produces the color of the compound eye (individual eye)), and  
257 may be related to this metabolic system in relation to vision. (4) Synthesis of  
258 tryptophan into proteins that are needed (tryptophan is an amino acid, so it is a  
259 raw material for proteins). To prove these hypotheses, we need to conduct  
260 further studies at physiological and/or molecular levels.

261

#### 262 *Metabolism of xenobiotics by cytochrome P450*

263 Eight genes differed between strains (see Figure 6D). At phenotypic level,  
264 comparisons of metabolisms between the strains have not been conducted in *T.*  
265 *castaneum*. On the other hand, in *Callosobruchus chinensis*, long-lines selected  
266 for longer duration of death feigning exhibited higher rates of emergence, laid  
267 bigger eggs compared with strains selected for shorter duration of death  
268 feigning and greater reproductive effort, and also had a tendency to develop  
269 faster<sup>22</sup>. These changes in life-history traits, correlated with the duration of  
270 death feigning, may be related to metabolism in insects because strains with  
271 longer duration of death feigning can conserve energy to reproduce during their  
272 lives. This trade-off between anti-predator strategies and energy conservation  
273 might relate to the metabolism. Therefore, it is required to measure differences

274 between the metabolisms of long and short strains of *T. castaneum*.

275

### 276 *Longevity regulating pathway*

277 Differences in expression in the longevity regulating pathway were also  
278 found in an RNA-seq study<sup>13</sup>. This pathway contains a catalase gene (*CAT*) seen  
279 in a larger number of variants in the long strain. Kiyotake et al.<sup>26</sup> has reported  
280 that the longer strains had lower relative expressions of *CAT*. This lower  
281 expression of *CAT* might be involved in the preservation of a large number of  
282 *CAT* variants in the long strain. Because *Tribolium* species have long longevity  
283 (more than 200 days), no comparison of lifetimes between strains was made. On  
284 the other hand, in *Callosobruchus chinensis*, long strains selected for longer  
285 duration of death feigning exhibited greater longevity compared short strains  
286 selected for shorter duration of death feigning and greater reproductive effort,  
287 and also had a tendency toward faster development<sup>21</sup>.

288

### 289 *Circadian rhythm*

290 Long strain beetles have a significantly larger variation than short strain  
291 beetles in the three circadian genes including *Per* (period), *Sgg* (Shaggy), and *Cyc*  
292 (Cycle). Although the previous RNA-seq study showed the expression of *Dbt*  
293 (doubletime) is only slightly between the short and long strains (Uchiyama et al.  
294 2019), the present DNA re-sequence did not find any difference in the *Dbt* gene  
295 between the strains. Therefore, it will be very interesting to compare the  
296 circadian rhythm of beetles derived from long and short strains in the future.

297

### 298 *Other genes*

299           There are other differences in the DNA sequences of the long and short  
300 strains; for example, the glutathione metabolism pathway and stress-resistance  
301 and heat-shock genes. Using the same strains as the present study, Kiyotake et  
302 al.<sup>26</sup> showed that the longer strains had lower relative expression of catalase  
303 (*CAT*) and growth-blocking peptide (*GBP*) genes compared to the short strains.  
304 These genes are related to anti-stress capacity, and Kiyotake et al.<sup>26</sup> showed that  
305 the long-strain beetles are significantly more sensitive to environmental  
306 stressors such as mechanical vibration and high or low temperatures than the  
307 short-strain beetles. The difference in stress resistance between the strains may  
308 relate to stress-resistance genes and the heat-shock system.

309

## 310 **Conclusion**

311           The duration of death feigning is related to many gene pathways,  
312 including caffeine metabolism, tyrosine metabolism, tryptophan metabolism,  
313 metabolism of xenobiotics by cytochrome P450, longevity regulating pathway,  
314 and circadian rhythm. Artificial selection based on the duration of death feigning  
315 results in the preservation of variants in genes in these pathways in the long  
316 strain. An animal's decision on when to wake up from a near-death experience  
317 is closely related to its success in avoiding predation<sup>5,27,28</sup>. This study suggests  
318 that many metabolic pathways and related genes may be involved in the  
319 decision-making process of anti-predator animal behavior by forming a network  
320 in addition to the tyrosine metabolic system including dopamine revealed in  
321 previous studies.

322

## 323 **Materials and Methods**

324 *(1) Insects*

325           The red flour beetle, *Tribolium castaneum* (Herbst 1797), is a stored-  
326 product insect found worldwide and a model genome species, designated by the  
327 *Tribolium* Genome Sequencing Consortium<sup>29</sup>. The protocol for artificial selection  
328 for the duration of death feigning was described in Miyatake et al.<sup>3</sup> Briefly, the  
329 duration of death feigning was measured in 100 male and 100 female adult  
330 beetles that were randomly selected. From these populations, 10 males and 10  
331 females with the shortest and longest durations of death feigning were allowed  
332 to reproduce for the next generation. The selection regime was continued for  
333 more than 20 generations<sup>14,15,16</sup>.

334

335 *(2) DNA extraction*

336           Female individuals in short or long strains were frozen by liquid nitrogen.  
337 Head and thoracic tissues without legs were removed from the frozen bodies by  
338 a pair of fine spring scissors. Each tissue was homogenized by the scissors and  
339 an electric homogenizer (T10+S10N-5G, IKA Works, Staufen, Germany) in an  
340 extraction buffer from an ISOGEN kit (Nippongene, Tokyo, Japan) according to  
341 the manufacturer's instructions. The quality and quantity of the extracted DNA  
342 were determined at 230, 260, and 280 nm using a spectrophotometer  
343 (Nanodrop<sup>TM</sup> 2000, Thermo Fisher Scientific, MA, USA).

344

345 *(3) Library construction and sequencing*

346           A total of 1–10 ng genomic DNA was fragmented by shearing to an  
347 average fragment size of 300 bp using an Adaptive Focused Acoustics sonicator  
348 (Covaris, Woburn, MA, USA). After purification, the paired-end DNA library was

349 constructed using a KAPA Hyper Prep kit (KAPA Biosystems, Wilmington, MA,  
350 USA). The fragmented DNA was end-repaired, dA-tailed, and ligated with the  
351 paired-end adapter according to the manufacturer's instructions. The adapter-  
352 ligated DNA was amplified by 14 cycles of high-fidelity polymerase chain  
353 reaction (PCR) amplification. Library quality and concentration were assessed  
354 using an Agilent Bioanalyzer 2100 (Agilent Technologies, Waldbronn, Germany)  
355 and an Agilent DNA 1000 kit. In addition, the library concentration was precisely  
356 determined using a KAPA Library Quantification Kit (Kapa Biosystems).

357 The paired-end libraries were sequenced by 200 cycles ( $2 \times 100$  bp)  
358 using the HiSeq 2500 (Illumina, San Diego, CA, USA). Reads were generated in  
359 FASTQ format using the conversion software bcl2fastq2 (Illumina, version 2.18).  
360 We submitted the read data to the Read Archive of DDBJ (accession number  
361 DRA011837).

362

#### 363 *(4) Read mapping to reference whole genome*

364 A series of data analyses was processed using CLC Genomics Workbench  
365 12 (Qiagen, Hilden, Germany). After adapter trimming and quality filtering, the  
366 clean read data were mapped to the reference genome of *T. castaneum* (Tcas5.2)  
367 that was obtained from the NCBI genome database  
368 (<https://www.ncbi.nlm.nih.gov/>). The mapping parameters were as follows:  
369 mismatch cost = 2, insertion cost = 3, deletion cost = 3, length fraction = 0.9, and  
370 similarity fraction = 0.9. After local realignment of the mapped reads, duplicate  
371 PCR reads were discarded.

372

#### 373 *(5) Small variant detection*

374 Variant calling based on single nucleotide variation (SNV) and insertion and  
375 deletion (InDel) was performed using the CLC Genomics Workbench built-in tool  
376 “Fixed Ploidy Variant Detection”. The calling parameters were as follows: ploidy  
377 = 2, required variant probability = 90.0, minimum coverage = 10, minimum  
378 frequency = 20, minimum central quality = 40, and minimum neighborhood  
379 quality = 30. Furthermore, high-quality variants were selected using QUAL = 80.  
380 Genes with non-synonymous substitutions in the selected variants were  
381 enriched as Gene Ontology (GO) and Kyoto Encyclopedia of Genes and Genomes  
382 (KEGG) ontology (KO) terms using the web-based tool “DAVID 6.8”  
383 (<https://david.ncifcrf.gov>)<sup>30</sup>. The enriched terms were statistically analyzed  
384 using the modified Fisher’s exact test ( $p < 0.05$ ) contained in the tool.

385

#### 386 *(6) Structural variant detection*

387 Variant calling based on copy number variation (CNV) was performed using  
388 CNVnator version 0.3.3<sup>31</sup>. The calling parameters were as follows: size  $\geq 4000$ ,  
389 normalized RD  $\geq 2$  or  $\leq 0.5$ , and E-value by  $t$ -test statistics  $< 0.05$ . In comparison,  
390 variant calling based on presence/absence variation (PAV) was run using the  
391 CLC Genomics Workbench built-in tool “InDel and Structural Variants”. The  
392 genes contained in the identified regions were enriched as GO and KO terms  
393 using the web-based tool “DAVID 6.8” The enriched terms were statistically  
394 analyzed using the modified Fisher’s exact test ( $p < 0.05$ ) contained in the tool.

395

#### 396 *(7) Functional annotation between variant and differentially expressed genes*

397 We investigated whether resequencing data was relevant to previous  
398 transcriptome analysis data<sup>13</sup>. A protein–protein interaction (PPI) network was



399 constructed using the String version 11.0<sup>32</sup>. The target protein searched for DAT  
400 having a central role in this study. The parameters were customized as follows  
401 for the output data: minimum required interaction score, 0.600; max number of  
402 interactors to show no more than 50 interactors (both 1st and 2nd shells).  
403 Pathway analysis was performed for “caffeine metabolism (tca00232)”,  
404 “tyrosine metabolism (tca00350)”, “tryptophan metabolism (tca00380)”,  
405 “metabolism of xenobiotics by cytochrome P450 (tca00980)”, “longevity  
406 regulating pathway - multiple species (tca04213)”, and “circadian rhythm - fly  
407 (tca04711)” using the R package “Pathview”<sup>33</sup>.

408

#### 409 *(8) Pathway analysis*

410 KEGG metabolic maps (<https://www.kegg.jp/kegg/kegg1.html>) based on  
411 FCs between the L and S strains were highlighted using the R/Bioconductor  
412 package “Pathview” to compare expression levels during death feigning<sup>34, 35,36</sup>.

413

#### 414 **Data Availability**

415 The datasets generated during and/or analyzed during the current study are  
416 available from the corresponding author on reasonable request.

417

418

419 **References**

- 420 1. Edmunds M. Defence in Animals. Longman, London. ISBN-10: 0582441323  
421 (1974).
- 422 2. Ruxton G, Allen WL, Sherratt TN, Speed M. Avoiding Attack: The Evolutionary  
423 Ecology of Crypsis, Warning Signals, and Mimicry. Second Edition, Oxford, UK:  
424 Oxford University Press (2018).
- 425 3. Miyatake, T., Katayama, K., Takeda, Y., Nakashima, A., Sugita, A., Mizumoto, M.  
426 Is death-feigning adaptive? Heritable variation in fitness difference of death-  
427 feigning behaviour. *Proceedings of Royal Society B* **271**, 2293–2296 (2004).
- 428 4. Humphreys, R., Ruxton, G.D. A review of thanatosis (death-feigning) as an  
429 antipredator behaviour. *Behavioral Ecology and Sociobiology* **72**, 22.  
430 <https://doi.org/10.1007/s00265-017-2436-8> (2018).
- 431 5. Sendova-Franks, A.B., Worley, A., Franks, N. R. Post-contact immobility and  
432 half-lives that save lives. *Proceedings of Royal Society B*  
433 <https://doi.org/10.1098/rspb.2020.0881>
- 434 6. Sakai, M. Death-Feigning in Insects: Mechanism and Function of Tonic  
435 Immobility (Entomology Monographs). Springer 1st ed. (2021).
- 436 7. Dennis DS, Lavigne RJ. Ethology of *Efferia varipes* with comments on species  
437 coexistence (Diptera: Asilidae). *Journal of Kansas Entomological Society* **49**,  
438 48-62 (1976).
- 439 8. Lawrence SE. Sexual cannibalism in the praying mantid, *Mantis religiosa*: a  
440 field study. *Animal Behaviour* **43**, 569-583 (1992).
- 441 9. Shreeve TG, Dennis RLH, Wakeham-Dawson A. Phylogenetic, habitat, and  
442 behavioural aspects of possum behaviour in European Lepidoptera. *Journal of*  
443 *Research Lepidoptera* **39**, 80–85 (2006).

- 444 10. Bilde T, Tuni C, Elsayed R, Pekár S, Toft S. Death feigning in the face of sexual  
445 cannibalism. *Biology Letter* **2**, 23-25 (2006).
- 446 11. Khelifa R. Faking death to avoid male coercion: extreme sexual conflict  
447 resolution in a dragonfly. *Ecology* **98**, 1724–1726 (2017).
- 448 12. van Veen JW, Sommeijer MJ, Aguilar Monge I. Behavioural development and  
449 abdomen inflation of gynes and newly mated queens of *Melipona beecheii*  
450 (Apidae, Meliponinae). *Insectes Sociaux* **46**, 361–365 (1999).
- 451 13. Uchiyama H, Sasaki K, Hinosawa S, Tanaka K, Matsumura K, Yajima S,  
452 Miyatake T. Transcriptomic comparison between beetle strains selected for  
453 short and long durations of death feigning. *Scientific Reports* **9**, 1004: DOI  
454 10.1038/s41598-019-50440-5 (2019).
- 455 14. Miyatake T, Tabuchi K, Sasaki K, Okada K, Katayama K, Moriya S. Pleiotropic  
456 anti-predator strategies, fleeing and feigning death, correlated with dopamine  
457 levels in *Tribolium castaneum*. *Animal Behaviour* **75**, 113–121 (2008).
- 458 15. Miyatake T, Nakayama S, Nishi Y, Nakajima S. Tonicly immobilized selfish  
459 prey can survive by sacrificing others. *Proceedings of Royal Society B* **276**,  
460 2763–2767 (2009).
- 461 16. Matsumura K, Miyatake T. Responses to relaxed and reverse selection in  
462 strains artificially selected for duration of death-feigning behavior in the red  
463 flour beetle, *Tribolium castaneum*. *Journal of Ethology* **36**, 161-168 (2018).
- 464 17. Matsumura, K., Miyatake, T. Polygene control and trait dominance in death-  
465 feigning syndrome in the red flour beetle *Tribolium castaneum*. (under review).
- 466 18. Nakayama S, Nishi Y, Miyatake T. 2010. Genetic correlation between  
467 behavioural traits in relation to death-feigning behaviour. *Population Ecology*  
468 **52**, 329-335

- 469 19. Konishi K, Matsumura K, Sakuno W, Miyatake T. Death feigning as an adaptive  
470 anti-predator behaviour: Further evidence for its evolution from artificial  
471 selection and natural populations. *Journal of Evolutionary Biology* **33**, 1120-  
472 1128. (2019).
- 473 20. Ohno T, Miyatake T. Drop or fly? Negative genetic correlation between death-  
474 feigning intensity and flying ability as alternative anti-predator strategies.  
475 *Proceedings of the Royal Society B* **274**, 555-560 (2007).
- 476 21. Nakayama S, Miyatake T. Positive genetic correlations between life-history  
477 traits and death-feigning behavior in adzuki bean beetle (*Callosobruchus*  
478 *chinensis*). *Evolutionary Ecology* **23**, 711-722. (2009a).
- 479 22. Nakayama S, Miyatake T. Genetic trade-off between abilities to avoid attack  
480 and to mate: a cost of tonic immobility. *Biology Letters* **6**, 18-20 (2009b).
- 481 23. Nakayama S, Miyatake T. A behavioral syndrome in the Adzuki bean beetle:  
482 Genetic correlation among death feigning, activity, and mating behavior.  
483 *Ethology* **116**, 108-112 (2010).
- 484 24. Nishi Y, Sasaki K, Miyatake T. Biogenic amines, caffeine and tonic immobility  
485 in *Tribolium castaneum*. *Journal of Insect Physiology* **56**, 622-628 (2010).
- 486 25. Nakayama S, Sasaki K, Matsumura K, Lewis Z, Miyatake T. Dopaminergic  
487 systems as the mechanism underlying personality in a beetle. *Journal of Insect*  
488 *Physiology* **58**, 750-755 (2012).
- 489 26. Kiyotake H, Matsumoto H, Nakayama S, Sakai M, Miyatake T, Ryuda M,  
490 Hayakawa Y. Gain of long tonic immobility behavioral trait causes the red flour  
491 beetle to reduce anti-stress capacity. *Journal of Insect Physiology* **60**, 92-97  
492 (2014).
- 493 27. Ishihara R, Matsumura K, Jones JE, Yuhao J, Fujisawa R, Nagaya N, Miyatake

- 494 T. Arousal from death feigning by vibrational stimuli: comparison of *Tribolium*  
495 species. *Journal of Ethology* **39**, 107–113(2021).
- 496 28. Franks NR, Worley A, Sendova-Franks AB. Hide-and-seek strategies and post-  
497 contact immobility. *Biology Letters* doi.org/10.1098/rsbl.2020.0892 (2021).
- 498 29. *Tribolium* Genome Sequencing Consortium. The genome of the model beetle  
499 and pest *Tribolium castaneum*. *Nature* **452**, 949-955 (2008).
- 500 30. Huang DW, Sherman BT, Tan Q, Collins JR, Alvord WG, Roayaei J, Stephens R,  
501 Baseler MW, Lane HC, Lempicki RA. DAVID Gene Functional Classification Tool:  
502 A novel biological module-centric algorithm to functionally analyze large gene  
503 list. *Genome Biol.* 2007 Sep 4;8 (9):R183. (2007).
- 504 31. Abyzov A, Urban AE, Snyder M, Gerstein M. CNVnator: An approach to  
505 discover, genotype, and characterize typical and atypical CNVs from family  
506 and population genome sequencing. *Genome Research* **21**, 974-984 (2011).
- 507 32. Szklarczyk D, Gable AL, Lyon D, Junge A, Wyder S, Hietra-Cepas J, Simonovic  
508 M, Doncheva NT, Morris JH, Bork P, Jensen LJ, von Mering C. STRING v11:  
509 protein–protein association networks with increased coverage, supporting  
510 functional discovery in genome-wide experimental datasets. *Nucleic Acids*  
511 *Research*, **47** D607–D613 (2019).
- 512 33. Luo W, Brouwer C. Pathview: an R/Bioconductor package for pathway-based  
513 data integration and visualization. *Bioinformatics*, **29**, 1830–1831(2013).
- 514 34. Kanehisa, M. and Goto, S.; KEGG: Kyoto Encyclopedia of Genes and Genomes.  
515 *Nucleic Acids Res.* **28**, 27-30 (2000).
- 516 35. Kanehisa, Furumichi, M., Tanabe, M., Sato, Y., and Morishima, K.; KEGG: new  
517 perspectives on genomes, pathways, diseases and drugs. *Nucleic Acids Res.*  
518 **45**, D353-D361 (2017).

519 36. Kanehisa, M., Sato, Y., Furumichi, M., Morishima, K., and Tanabe, M.; New  
520 approach for understanding genome variations in KEGG. *Nucleic Acids Res.*  
521 **47**, D590-D595 (2019).

522

### 523 **Acknowledgements**

524 This work was supported by the Japan Society for the Promotion of Science  
525 Grant-in-Aid for Scientific Research Grants 18H02510 (to T.M., K.S.), and the  
526 Cooperative Research Grant of the Genome Research for BioResource, NODAI  
527 Genome Research Center, Tokyo University of Agriculture (to T.M., K.S., S.Y.).

528

529

530

531 **Figure Legends**

532

533 **Figure 1.** Analytical results of small variants of DNA sequence in long and short  
534 strains. Proportion of small variants as SNV, MNV, deletion, insertion, and  
535 replacement in long and short strains (A). The numbers of small variants are  
536 indicated as the diameter of a pie graph. Frequencies of the SNVs in both long  
537 and short strains were compared with the reference nucleotide (B). Insertion  
538 and deletion ranged from one to nine bases in both long and short strains (C).  
539 Frequency of homozygosity or heterozygosity in all linkage groups in long and  
540 short strains (D).

541

542 **Figure 2.** Analytical results of small variants in genes. Numbers of genes with  
543 variants in long and short strains (A). Frequency of the number of non-  
544 synonymous variants per gene in long and short strains (B). Enrichment analyses  
545 of the function of genes with variants sorted into four categories (biological  
546 process, cellular component, molecular function, and KEGG pathway) (C).

547

548 **Figure 3.** Structural variations including large-scale insertion and deletion  
549 (InDel) (A), copy number variation (CNV) (B), and presence/absence variation  
550 (PAV) (C) in long and short strains. Large-scale InDels were analyzed from 10 to  
551 390 bases. CNV duplication and deletions were analyzed were from 4 to 80  
552 kbases. PAV were analyzed from 0 to 7000 kbases.

553

554 **Figure 4.** Structural variations on each linkage group in long and short strains  
555 (A). Structural variations include large-scale insertion and deletion, CNV

556 duplication and deletion, and presence and absence of variation. The long and  
557 short strains are indicated by orange and blue lines, respectively. GO and KO  
558 terms are from function of genes with variants (B).

559

560 **Figure 5.** Protein–protein interaction (PPI) network including enzymes involved  
561 in dopamine metabolism. Lines indicate the relationships between genes. Stars  
562 and triangles indicate genes with variants and differentially expressed genes  
563 (DEGs), respectively.

564

565 **Figure 6.** Functional genes with frequency of variants in KEGG pathways.  
566 Caffeine metabolism (A), tyrosine metabolism (B), tryptophan metabolism (C),  
567 metabolism of xenobiotics by cytochrome P450 (D), longevity regulating  
568 pathway (E) and circadian rhythm (F) are indicated.

569

570

571

572

573

574

575

576

577

578



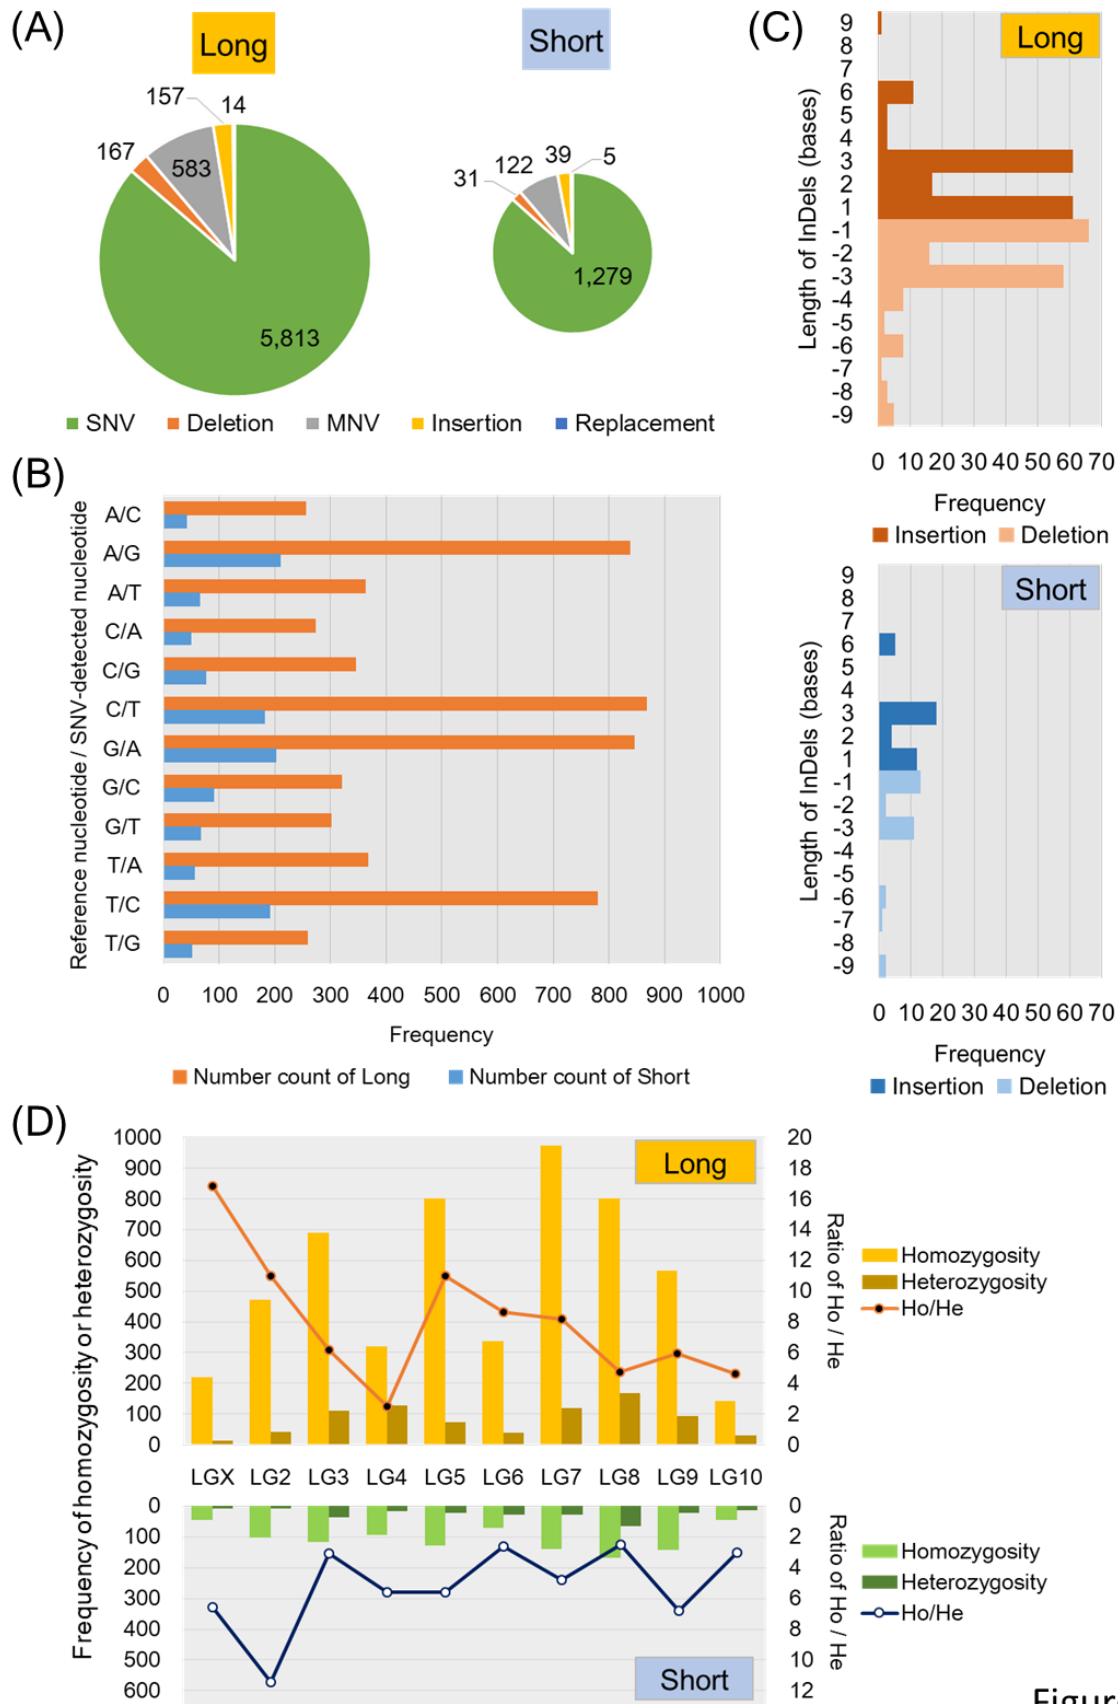

Figure 1

579

580

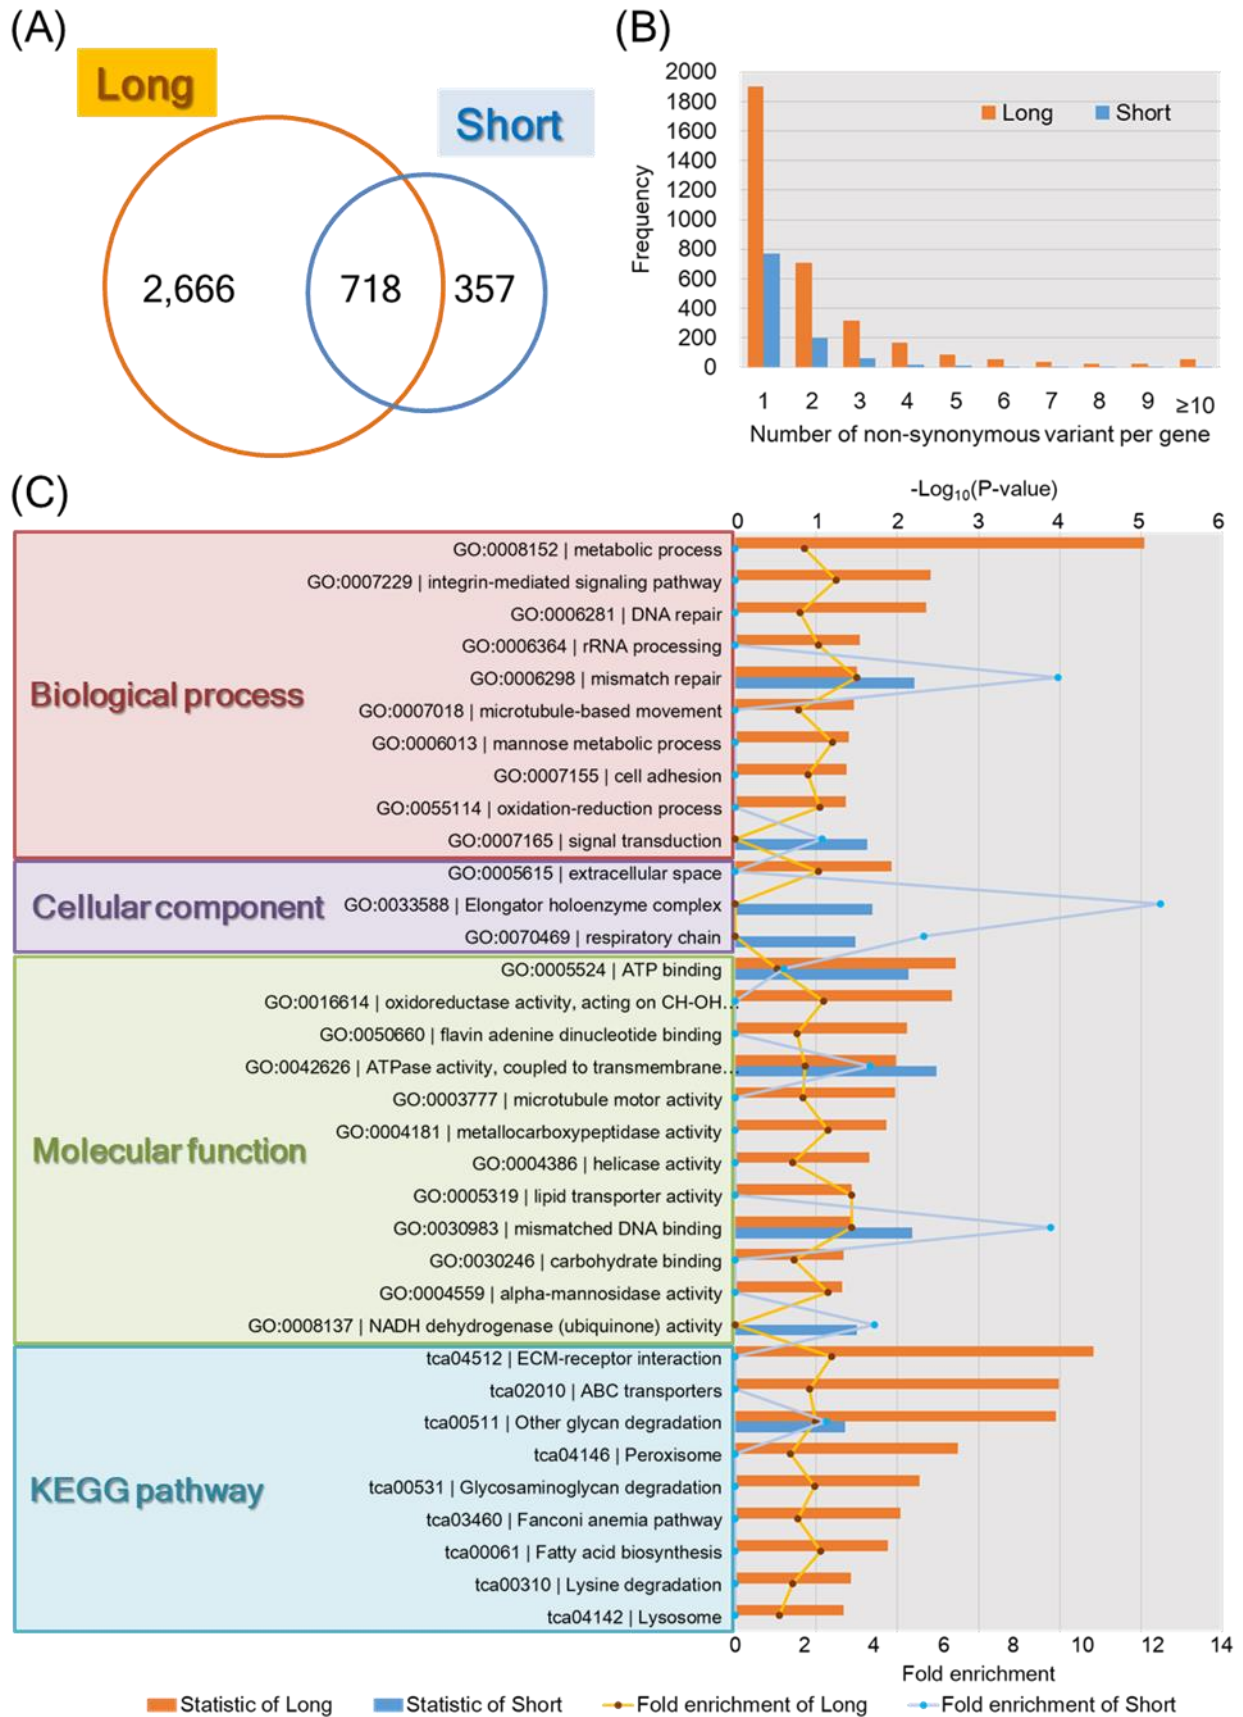

Figure 2

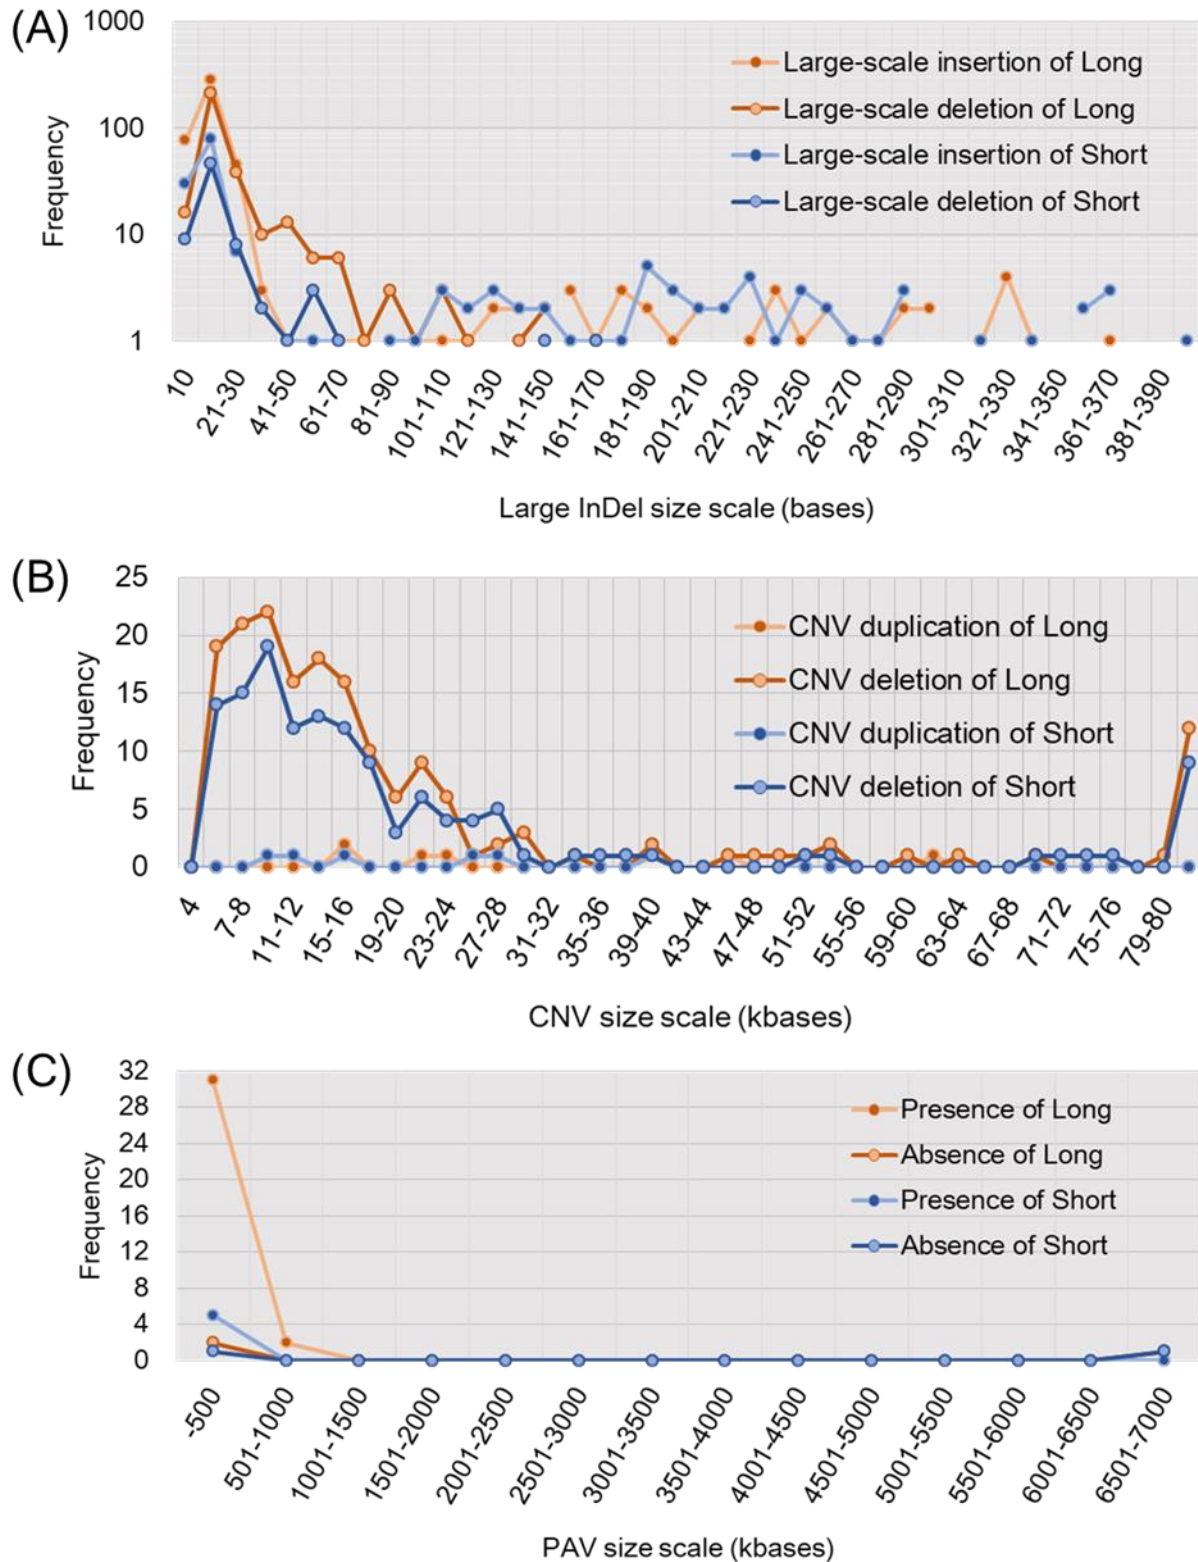

Figure 3



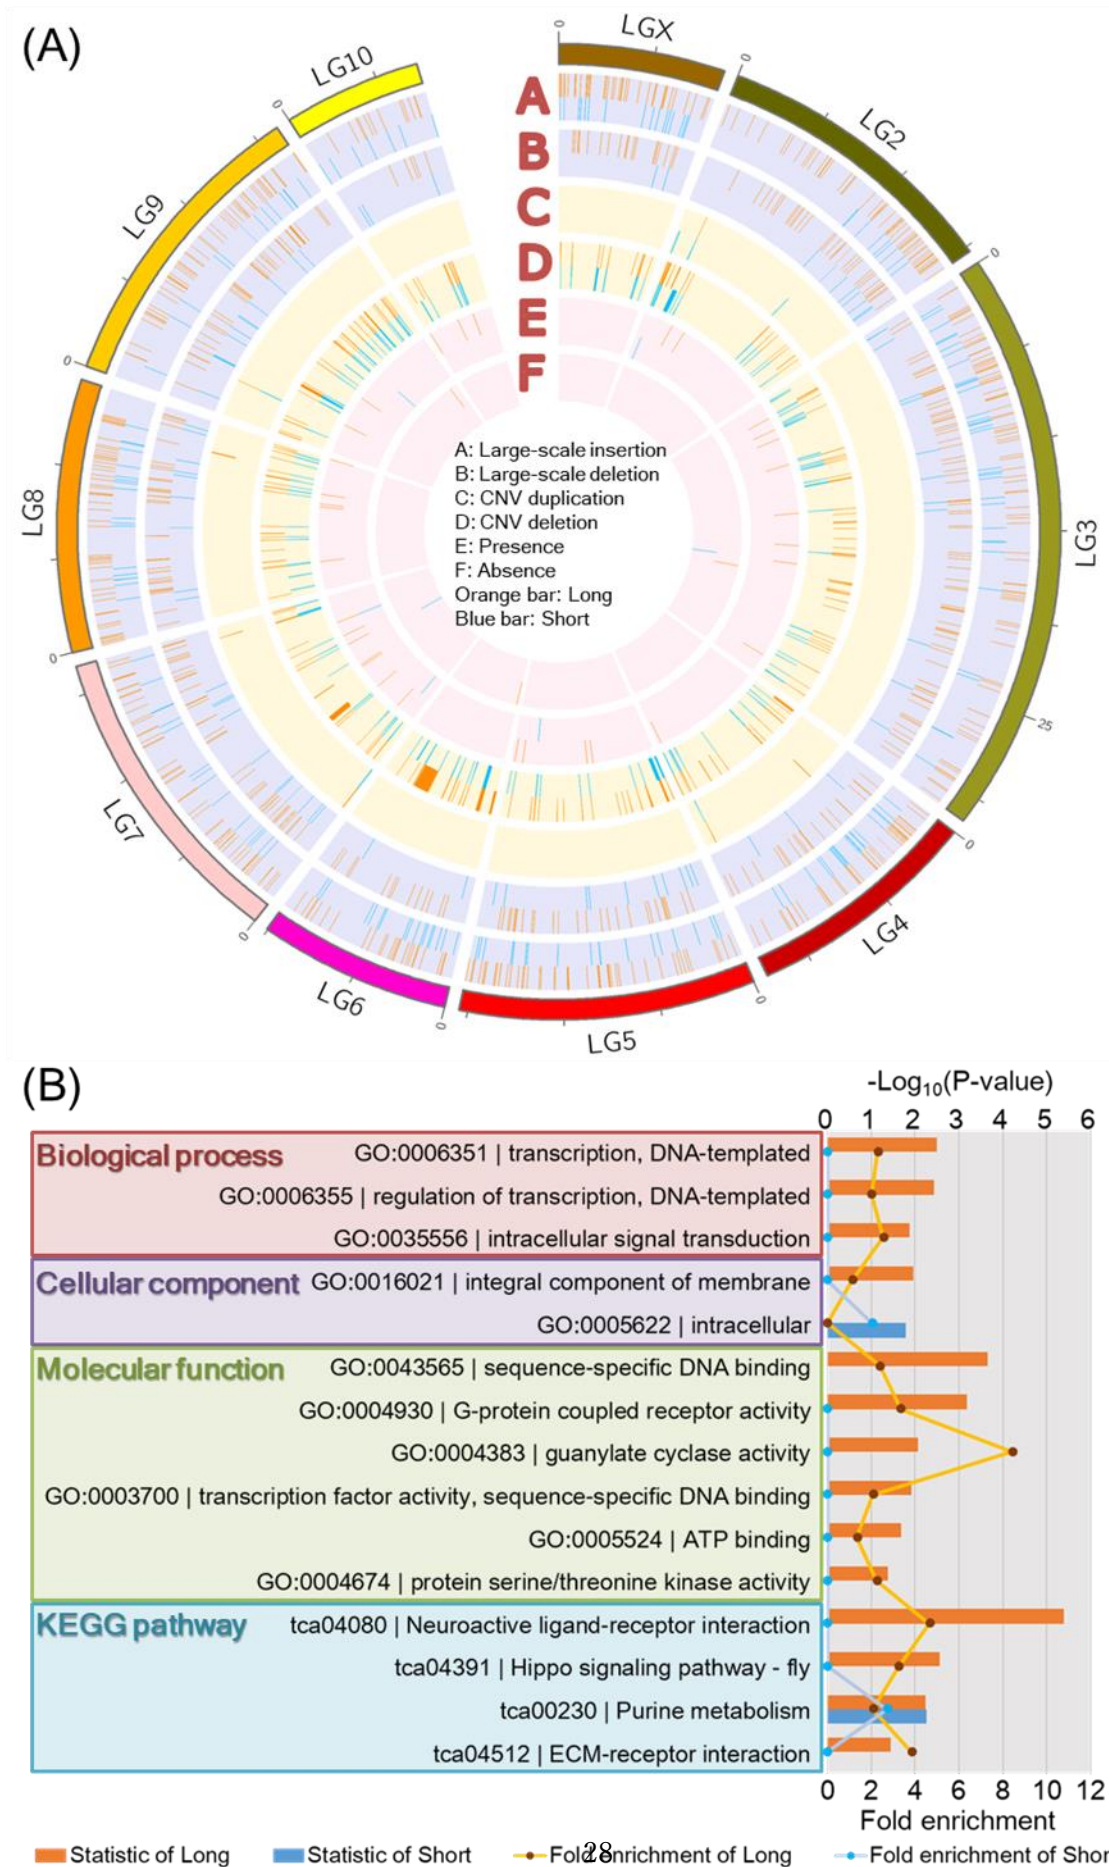

Figure 4

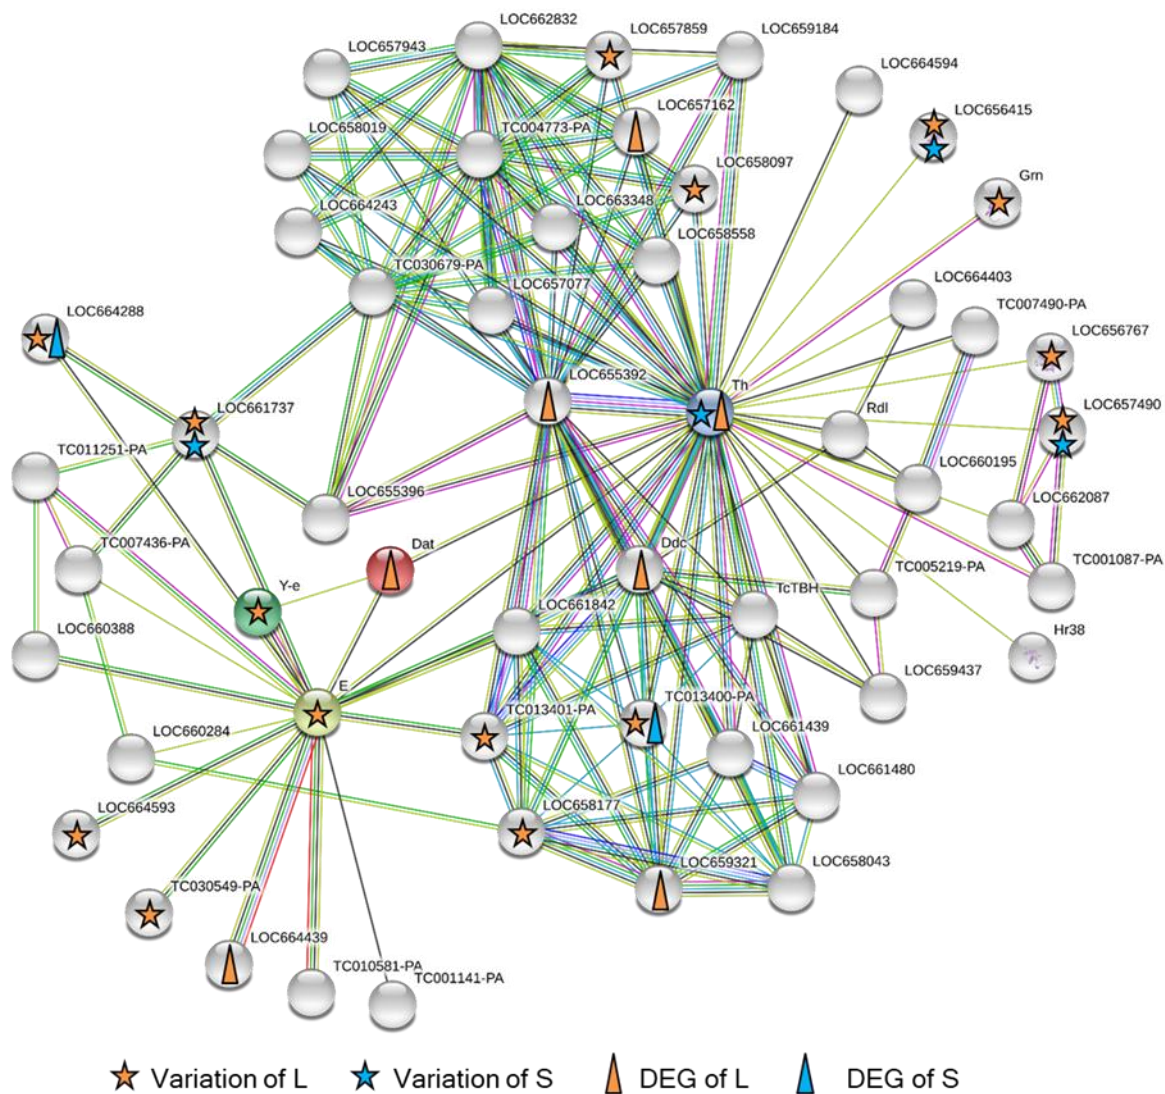

Figure 5

584  
585  
586  
587





(C)

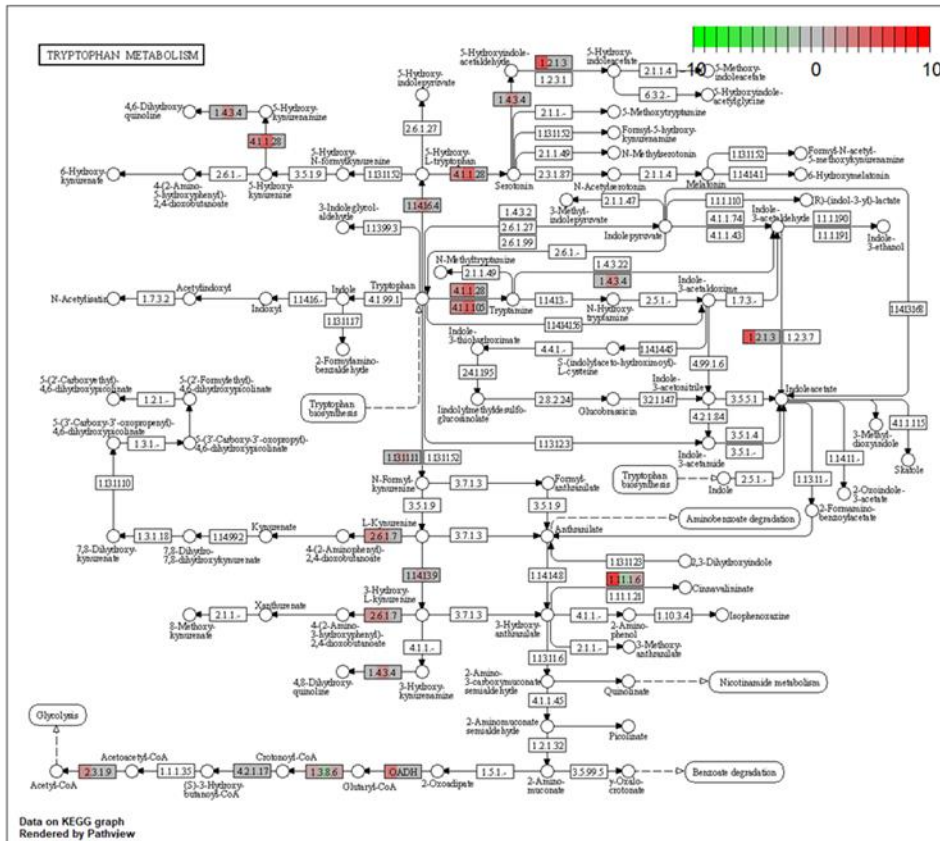

(D)

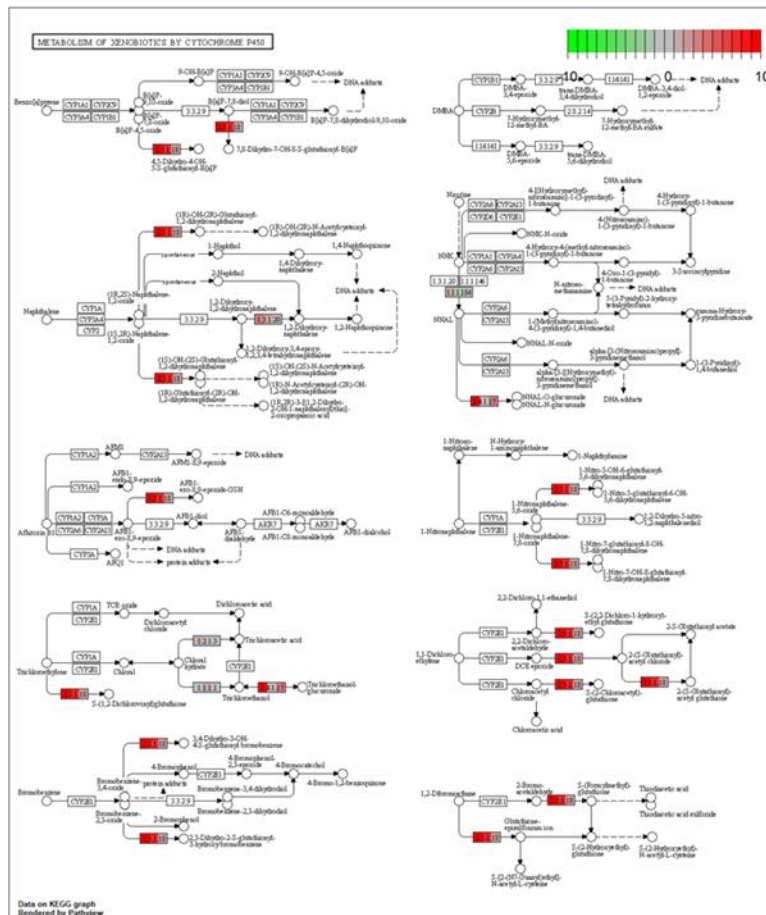

Figure 6

(E)

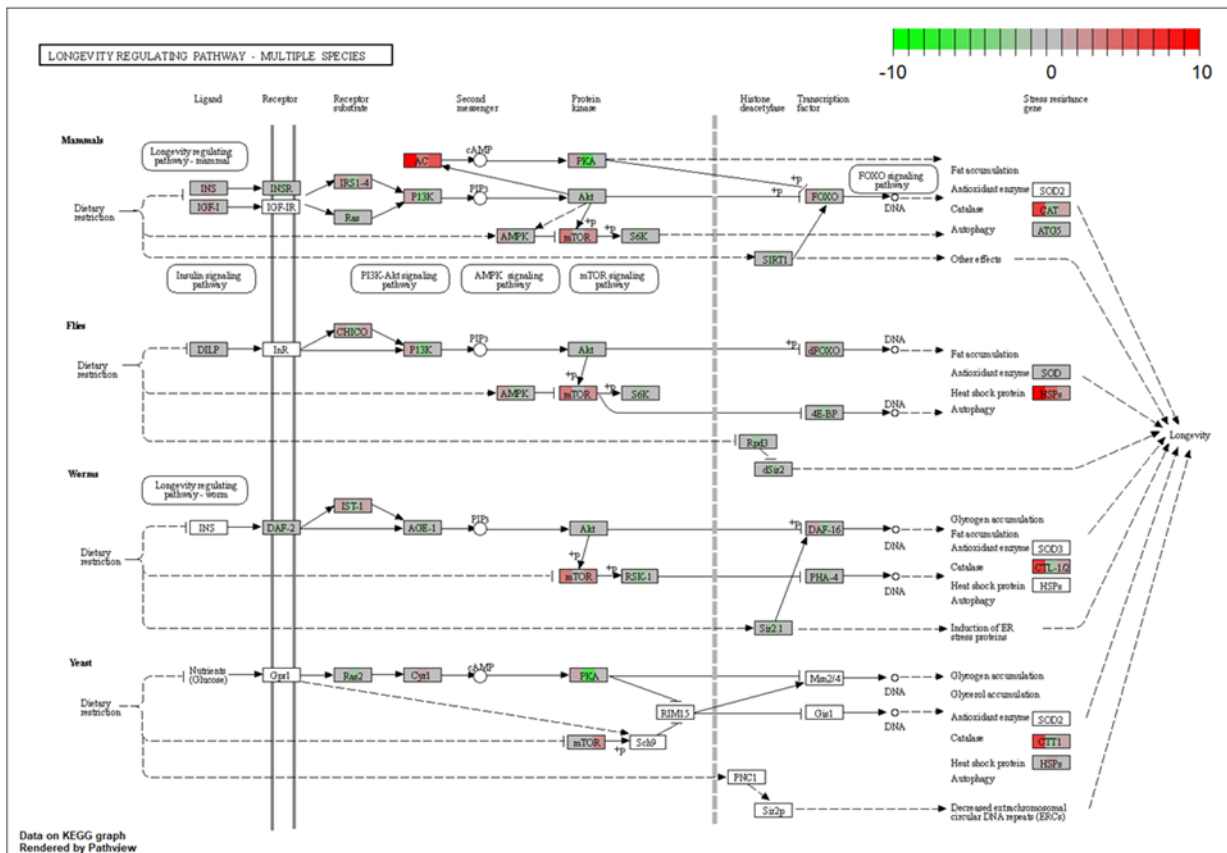

(F)

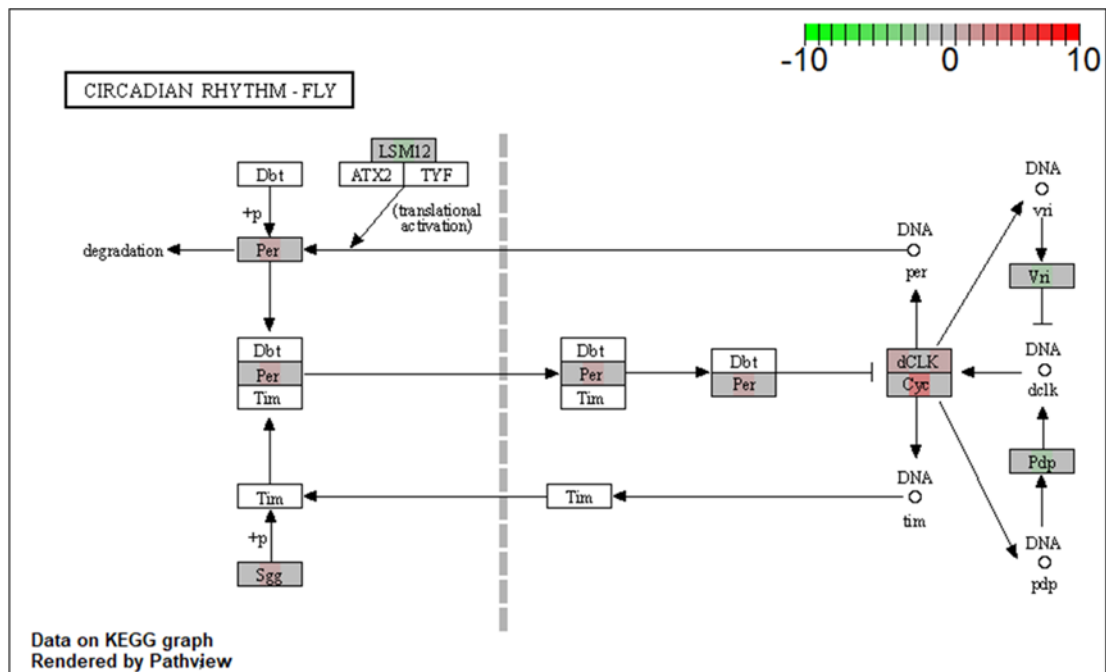

Figure 8
